# Supplementary material for: Tumor-Induced Cardiac Dysfunction: A Potential Role of ROS
Source: MDPI journal article supplement (doi:10.3390/antiox10081299), 2021-08-18
Supplement: s1 [file s1]

## **Supplemental files**

## **Tumor-induced cardiac dysfunction: a potential role of ROS**

Priyanka Karekar<sup>1</sup>, Haley N. Jansen<sup>1</sup>, Kathryn L.G. Russart<sup>2</sup>, Devasena Ponnalagu<sup>1</sup>, Sarah Seeley<sup>3</sup>, Shridhar Sanghvi<sup>1</sup>, Sakima A. Smith<sup>4</sup>, Leah M. Pyter<sup>2</sup>, Harpreet Singh<sup>1\*</sup>, Shubha Gururaja Rao<sup>1, 3\*</sup>

<sup>1</sup>Department of Physiology and Cell Biology, The Ohio State University, Columbus OH 43210

<sup>2</sup>Institute for Behavioral Medicine Research, Departments of Psychiatry and Behavioral Health & Neuroscience, The Ohio State University, Columbus OH 43210

<sup>3</sup>Department of Pharmaceutical and Biomedical Sciences, Raabe College of Pharmacy, Ohio Northern University, Ada, OH 45810

<sup>4</sup>Division of Cardiovascular Medicine, Ohio State University Wexner Medical Center, Columbus, OH, USA

\* Co-corresponding authors

Harpreet.singh@osumc.edu

s-gururajao@onu.edu

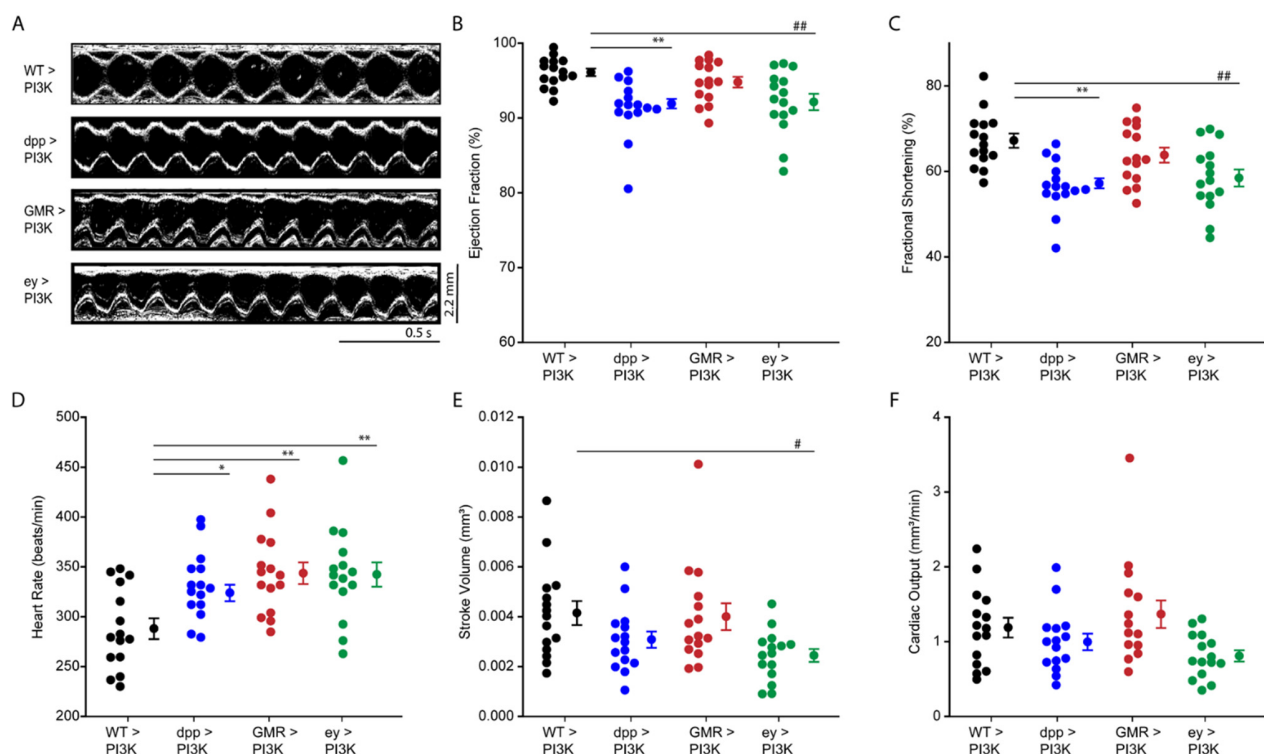

**Supplemental Figure S1: Cardiac function of third instar larvae overexpressing PI3K using dpp, GMR, and ey Gal4 drivers.** PI3K overexpressed in dpp, GMR, and eyeless Gal4 drivers show varying degrees of cardiac dysfunction in *D. melanogaster* larvae. **A.** OCT images of flies. dpp>PI3K resulted in reduced EF and FS (**B, C**). ey>PI3K showed the most cardiac dysfunction, with reduced EF, FS, and SV (**B, C, E**). Heart rate was found to be significantly higher in overexpression using all three drivers (**E**). However, PI3K overexpression did not cause a significant reduction in cardiac output in any groups (**F**). # $p < 0.05$ ; \* $p < 0.01$ ; ## $p < 0.005$ ; \*\* $p < 0.001$ ,  $n \geq 10$ . Statistical significance was calculated by the Holm-Sidak test (multiple comparisons to control), and the Student-Newman-Keuls test (multiple pairwise comparisons).

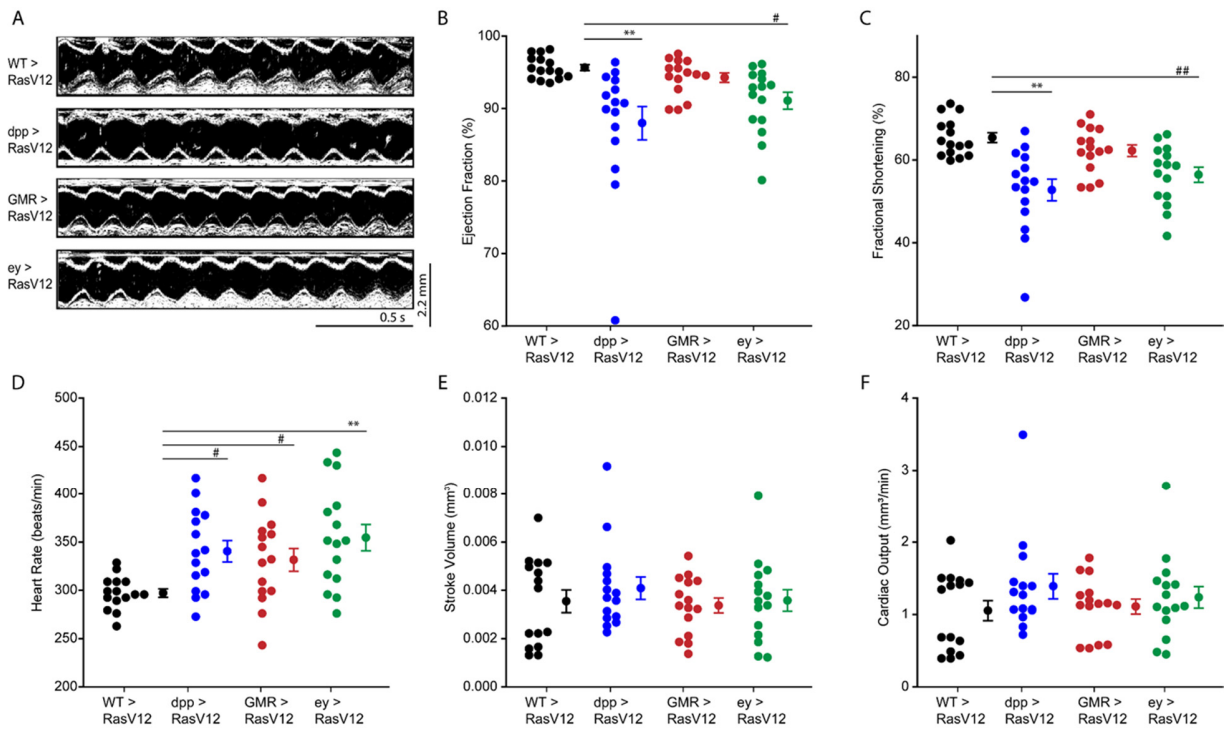

**Supplemental Figure S2: Cardiac function of third instar larvae overexpressing RasV12 using dpp, GMR, and ey Gal4 drivers.** RasV12 overexpression caused cardiac dysfunction in 3rd instar larvae. **A**. OCT images of flies. dpp>RasV12 and ey>RasV12 caused a reduction in EF and FS (**B**, **C**). Heart rate was increased significantly with all three drivers compared to WT control (**D**), but there were no changes in SV and CO (**E**, **F**). #p < 0.05; ##p < 0.005; \*\*p < 0.001, n<sub>≥</sub>10. Statistical significance was calculated by the Holm-Sidak test (multiple comparisons to control), and the Student-Newman-Keuls test (multiple pairwise comparisons).

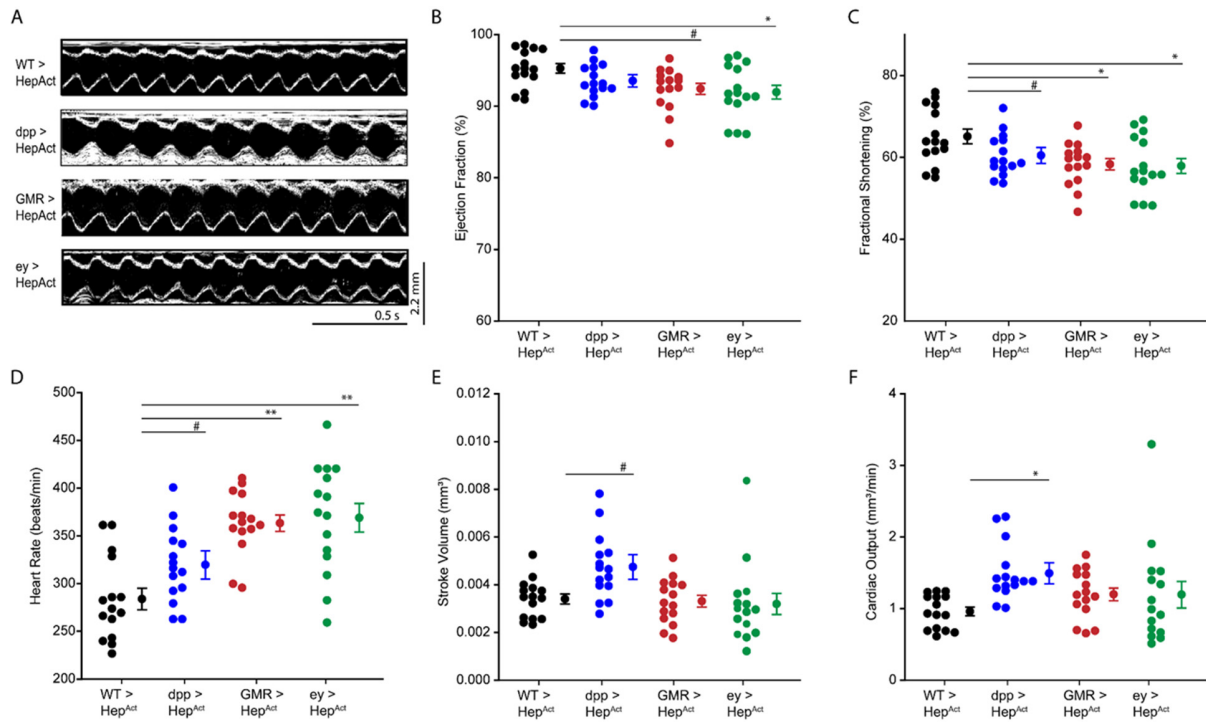

**Supplemental Figure S3: Cardiac function of larvae overexpressing Hep<sup>Act</sup> using dpp, GMR, and ey Gal4 drivers.** **A.** OCT images of flies. **B.** EF obtained from OCT traces. HepAct overexpression results in significant cardiac dysfunction. dpp>Hep<sup>Act</sup> shows a significant reduction in FS and increases in HR (**C, D**). Interestingly, we observe an increase in stroke volume and cardiac output in this group, as compared to the control. GMR>HepAct larvae exhibit lowered EF and FS, and increased HR (**B, C, D**). ey>HepAct shows the most dysfunction, with increased EF and FS, and increased HR. #p < 0.05; \*p < 0.01; ##p < 0.005; \*\*p < 0.001, n<sub>≥</sub>10. Statistical significance was calculated by the Holm-Sidak test (multiple comparisons to control), and the Student-Newman-Keuls test (multiple pairwise comparisons).

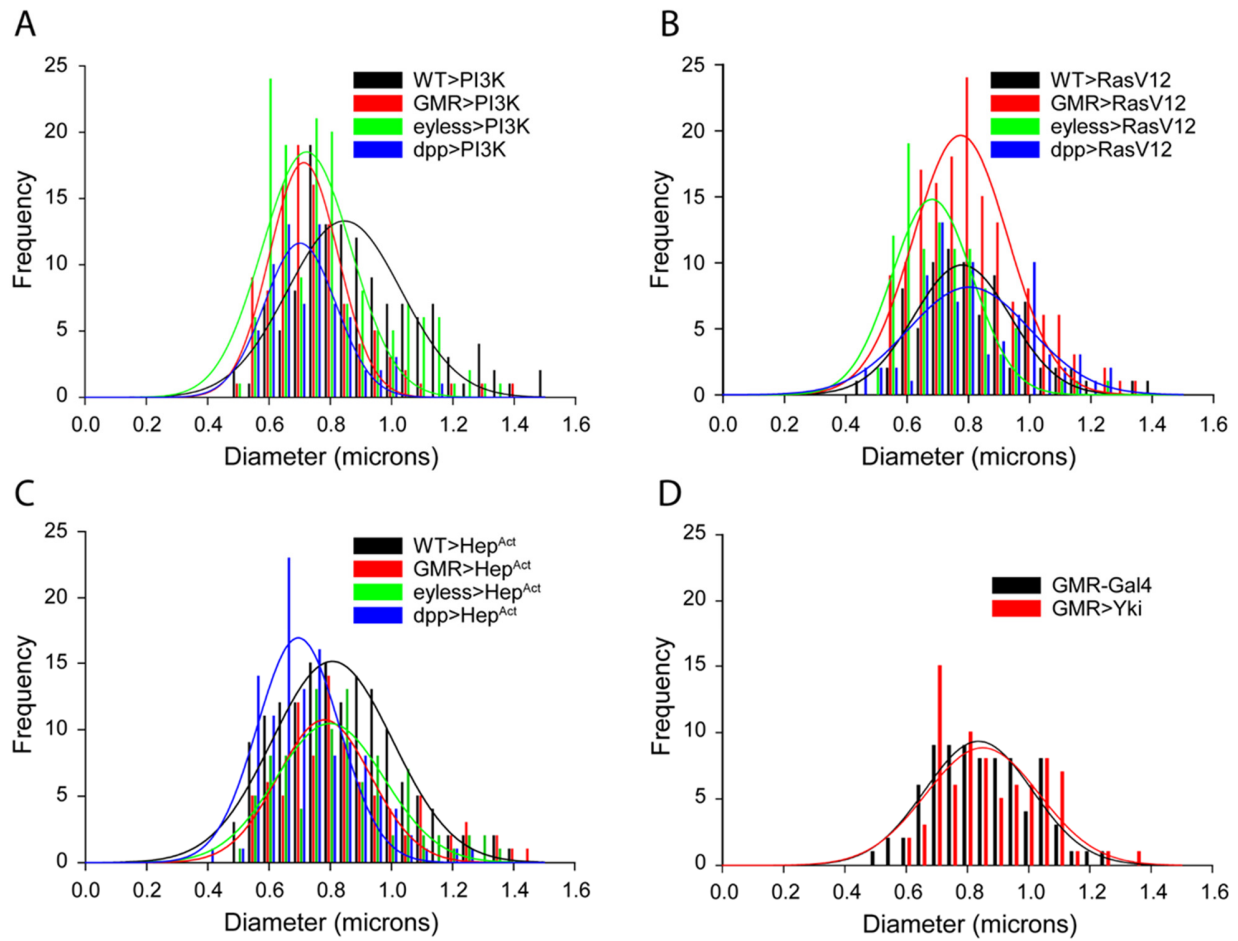

**Supplemental Figure S4: Thickness of pericardin fibers around the cardiac tube in larvae overexpressing oncogenes.** Frequency histograms of pericardin fiber thickness around the cardiac tube in *D. melanogaster* hearts. No significant differences were observed in pericardin fiber thickness of larvae overexpressing oncogenes PI3K (**A**), RasV12 (**B**), Hep<sup>Act</sup> (**C**), and Yki (**D**) using drivers dpp, GMR, and eyeless Gal4, indicating that overexpressing these oncogenes did not cause cardiac fibrosis,  $n \geq 10$ . Statistical significance was calculated by the Holm-Sidak test (multiple comparisons to control), and the Student-Newman-Keuls test (multiple pairwise comparisons).

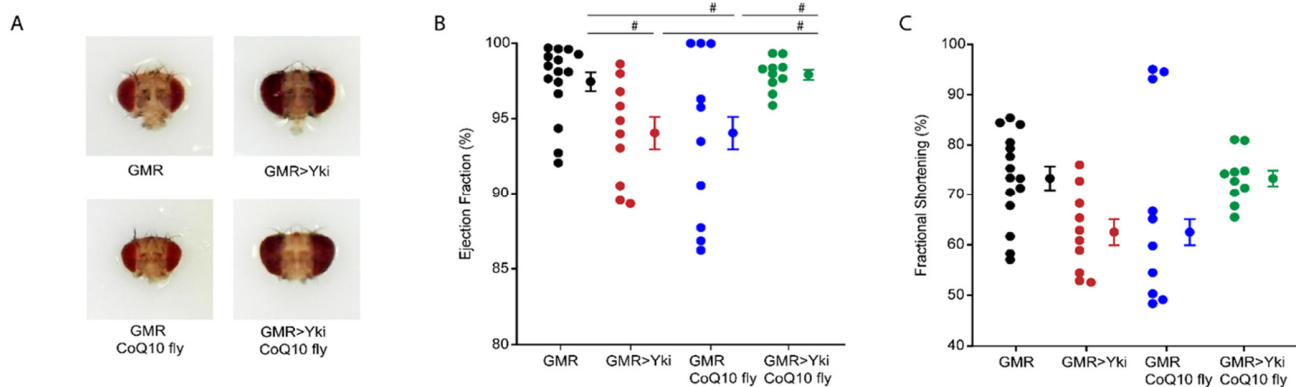

**Supplemental Figure S5: Heart function of 7 day old flies overexpressing Yki using GMR-Gal4 driver, with CoQ10 supplementation from day 1-7. (A)** Images of 7 day old *D. melanogaster* eyes with and without tumor and/or CoQ10 supplementation. **(B)**, and **(C)**, show EF, and FS, respectively (n=10 each). #p < 0.05. Statistical significance was calculated by the Holm-Sidak test (multiple comparisons to control), and the Student-Newman-Keuls test (multiple pairwise comparisons).

A

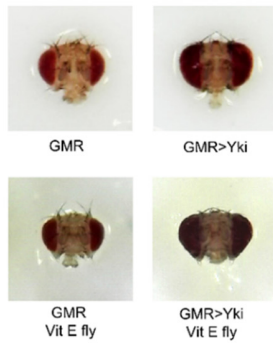

B

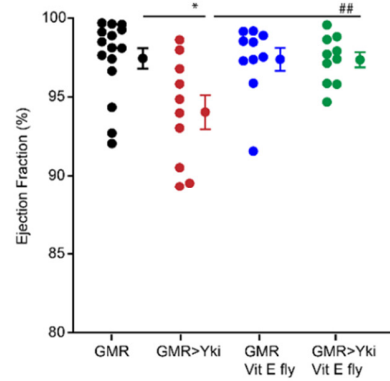

C

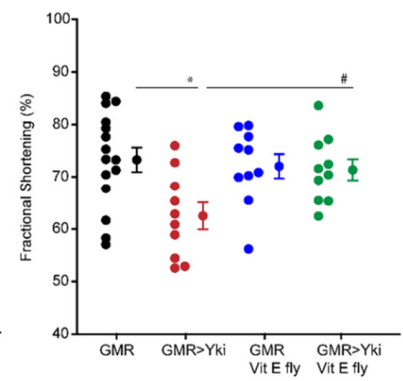

**Supplemental Figure S6: Cardiac function of 7-day-old flies overexpressing Yki using GMR-Gal4 driver, with Vitamin E supplementation from day 1-7.** Vitamin E supplementation did not cause a reduction in tumor **(A)**. Ejection fraction **(B)** and fractional shortening **(C)** were improved in GMR>Yki flies supplemented with Vit E. #p < 0.05; \*p < 0.01; ###p < 0.005, n<sub>≥</sub>10. Statistical significance was calculated by the Holm-Sidak test (multiple comparisons to control), and the Student-Newman-Keuls test (multiple pairwise comparisons).



A

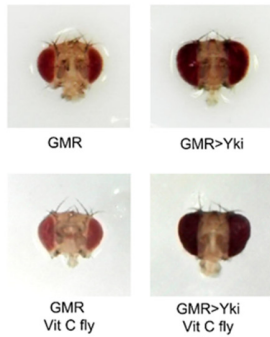

B

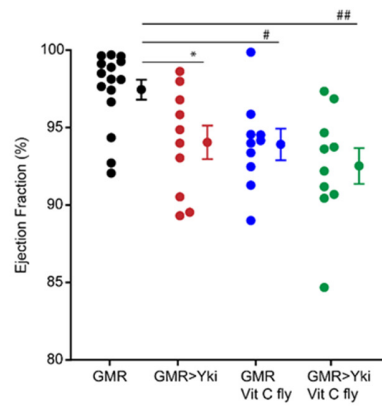

C

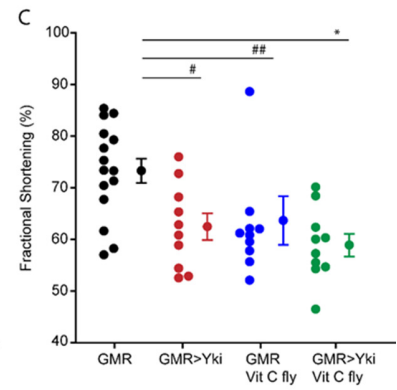

**Supplementary Figure S7: Cardiac function of 7-day-old flies overexpressing Yki using GMR-Gal4 driver, with Vitamin C supplementation from day 1-7.** Vitamin C supplementation did not cause a reduction in tumor (**A**). Please note that the tumor in GMR>Yki is not changing with Vit C (**A**). There is no significant rescue in cardiac parameters - ejection fraction (**B**), fractional shortening (**C**), heart rate (**D**), stroke volume (**E**), and cardiac output (**F**). # $p < 0.05$ ; \* $p < 0.01$ ; ### $p < 0.005$ ; \*\* $p < 0.001$ ,  $n \geq 10$ . Statistical significance was calculated by the Holm-Sidak test (multiple comparisons to control), and the Student-Newman-Keuls test (multiple pairwise comparisons).

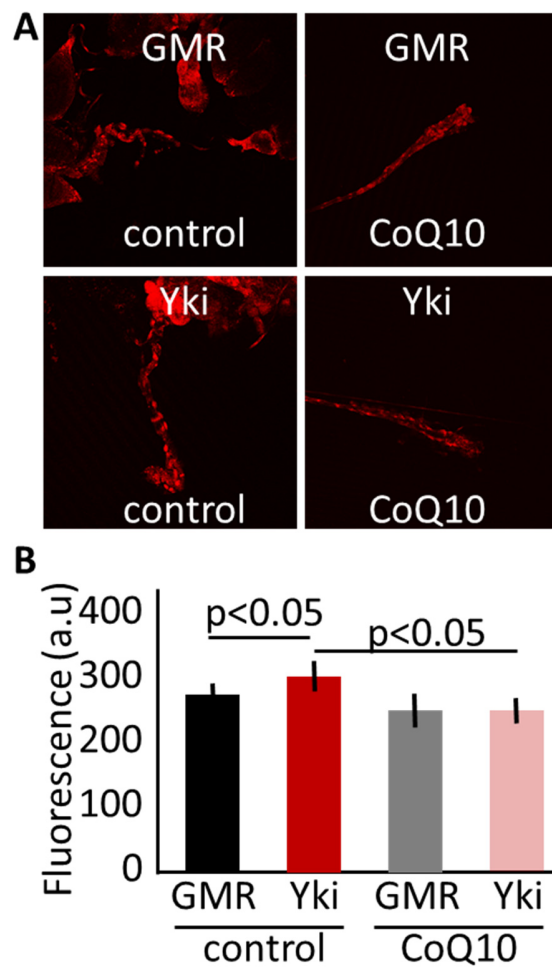

**Supplemental Figure S8. Antioxidants reduce ROS in the cardiac tube. Cardiac tubes were dissected from flies fed with regular media or CoQ10.** Cardiac tubes were stained with DHE and imaged with a confocal microscope. **A.** Confocal images of cardiac tubes of flies fed with regular food or food supplemented with antioxidants (CoQ10). **B.** Quantification of DHE stained ROS in cardiac tubes.  $n=5-8$  flies. Statistical significance was calculated by Student's t-test.

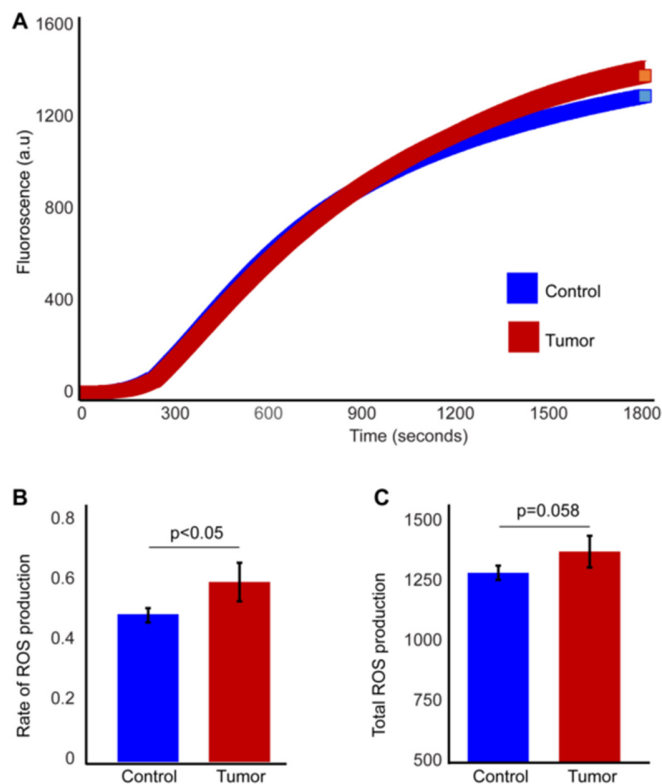

**Supplemental Figure S9. Tumor-bearing mice hearts show an increased rate of mitochondrial ROS generation.** ROS was measured in hearts of isolated mitochondria from control and tumor-bearing mice. **A.** Graph representing ROS production for 30 mins after addition of isolated mitochondria from control (blue), tumor (red). **B.** Bar graph representing a rate of ROS production, tumor-bearing mice have a significantly high rate of ROS production # $p < 0.05$ ;  $n \geq 4$ . **C.** Total ROS generation calculated from **A**, there is a trend for increased total ROS in tumor mice but it is not statistically significant  $n \geq 4$ . (statistical significance was calculated by Student's t-test).
